# Supplementary material for: Substitution of polysorbates by plant-based emulsifiers: impact on vitamin D bioavailability and gut health
Source: Research Square preprint supplement (doi:10.21203/rs.3.rs-5818990/v2), 2025-03-11
Supplement: Supplementary file 1 [file 35590683e35cd64f3f2c0d3f.docx]

**Table S1. List of mice primers used for RT-qPCR experiments**

| **Name** | **Forward (5′→3′)** | **Reverse (5′→3′)** |
| --- | --- | --- |
| TNF-α | CATCTTCTCAAAATTCGAGTGACAA | TGGGAGTAGACAAGGTACAACCC |
| IL-6 | ACAAGTCGGAGGCTTAATTACACAT | TTGCCATTGCACAACTCTTTTC |
| CXCL-1 | CATCCGCTATCAGCTAAACCA | CAGAAGCGTCTGTGCTGTGT |
| Reg3-γ | ATGACCCGACACTGGGCTAT | AGAGGAAGGATTCGTCTCCCA |
| Muc2 | GTCCGAAGTGTTACCCTGGAAT | CAGCTCTCGATGTGTGTGTAGGT |
| Muc3 | TGGTCAACTGCGAGAATGGA | TACGCTCTCCACCAGTTCCT |
| Meprin-β | TTGCCAGCTCCGGAAAAGTT | AAGGTCCAGACCCAAACCTTG |
| Klf4 | CTCCCGTCCTTCTCCACGTT | TCCTCACGCCAACGGTTAGT |

**S2. Exposition to emulsifiers**

A wide range of products contains different emulsifiers (more than 53.8% of industrial food products (including beverages) include at least one emulsifier 1,2). For this study, we assumed as “plausible” a situation where an adult of 70 kg consumes as 10% of his diet an emulsion-based product (200mL out of 2 kg of food) with 10% of oil stabilized with a solution containing 2% of T80. For the mice experiments, we therefore substituted 10% of the diet by this emulsion, which resulted in an exposition of 180 mg/kg body weight/day. In this scenario, exposition to T80 when converted to human according to Reagan-Shaw et al. 3 is of 14.59 mg/kg body weight/day. Values are bellow the acceptable daily intake (ADI) reported by the European Food Safety Agency (EFSA) (25 mg/kg body weight/day) 4.

Calculations for T80 exposure

3

**References**

1. Chazelas, E. *et al.* Food additives: distribution and co-occurrence in 126,000 food products of the French market. *Sci. Rep.* **10**, 3980 (2020).

2. Open Food Facts. https://world.openfoodfacts.org/discover (2024).

3. Reagan‐Shaw, S., Nihal, M. & Ahmad, N. Dose translation from animal to human studies revisited. *FASEB J.* **22**, 659–661 (2008).

4. EFSA Panel on Food Additives and Nutrient Sources added to Food (ANS). Scientific Opinion on the re‐evaluation of polyoxyethylene sorbitan monolaurate (E 432), polyoxyethylene sorbitan monooleate (E 433), polyoxyethylene sorbitan monopalmitate (E 434), polyoxyethylene sorbitan monostearate (E 435) and polyoxyethylene sorbitan tristearate (E 436) as food additives. *EFSA J.* **13**, (2015).
